# Supplementary material for: Application of metabolomics in the diagnosis of breast cancer: a systematic review
Source: PubMed Central journal article supplement (PMC7066003; doi:10.7150/jca.37604), 2020-02-10
Supplement: jcav11p2540s1.pdf [file jcav11p2540s1.pdf]

**Supplementary Table S1**

| Ref. | First Author (Year)     | Case (Sample Size) | Control (Sample Size)                  | Sample | Detecting Instrument     | Targeted/Untargeted | Up-regulated Metabolites                                                                                                                                                                                                                                                                                             | Down-regulated Metabolites                                                                                                                                                                                                                                 |
|------|-------------------------|--------------------|----------------------------------------|--------|--------------------------|---------------------|----------------------------------------------------------------------------------------------------------------------------------------------------------------------------------------------------------------------------------------------------------------------------------------------------------------------|------------------------------------------------------------------------------------------------------------------------------------------------------------------------------------------------------------------------------------------------------------|
| 8    | Hua Zhao (2019)         | BC patients(358)   | healthy control(138)                   | plasma | UHPLC-MS<br>GC-MS        | Untargeted          | thioprolin, inosine, 3-hydroxyoctanoate, 3-hydroxybutyrate, stearate (18:0), linoleate (18:2n6), dihomo-linoleate, 10-nonadecenoate(19:1n9)                                                                                                                                                                          | cysteine S-sulfate, threonylphenylalanine, sphingomyelin, bilirubin, glucuronate, 1-(1-enyl-stearoyl)-2-dihomo-linolenoyl-GPE, urea, 3-methylxanthine, 1-palmitoyl-GPA (16:0)                                                                              |
| 9    | Baowen Yuan (2019)      | BC patients(189)   | healthy control(150)                   | plasma | UHPLC-MS/MS<br>FIA-MS/MS | Targeted            | acetylcarnitine C2, C14:1                                                                                                                                                                                                                                                                                            | alanine, asparagine, glutamate, histine, leucine, lysine, methionine, ornithine, phenylalanine, threonine, trptophan, tyrosine, valine, kynurenine, methionine sulfoxide, acetylcarnitine C3                                                               |
| 10   | Matthias Pietzke (2019) | BC patients(68)    | healthy control(50)                    | serum  | GC-MS<br>LC-MS           | Targeted            | sernine, aspartate, arginine                                                                                                                                                                                                                                                                                         | formate, sarcosine                                                                                                                                                                                                                                         |
| 11   | Takeshi Murata (2019)   | IDC patients(101)  | healthy control(42)<br>(BE patients 2) | saliva | LC-MS<br>CE-MS           | Untargeted          | spermine, N1-acetylspermine, leucine, glutamine, serine, spermidine, isoleucine, N1-acetylspermidine, cadaverine. butanoate, carnitine, succinate, theonine, arginine, lactate, valine, 1,3-diaminopropane, Ru5P, gamma-butyrobetaine, N-acetylneuraminat, alanine, propionate, choline, DHAP, 5-aminovalerate, GABA |                                                                                                                                                                                                                                                            |
| 12   | Xiao Luo (2018)         | BC patients(60)    | healthy control(40)                    | plasma | LC-MS                    | Untargeted          | glycerophosphocholine, phenyllactic acid, pentosidine, epinephrine glucuronide, homoanserine, nicotinuric acid, choline                                                                                                                                                                                              | glutamine, lysine, glycolaldehyde, sphingosine 1-phosphate, phenylglyoxylic acid, butyrylcarnitine, 3-pyridylacetic acid, 3-indolepropionic acid, stearoylcarnitine, linoleyl carnitineic acid, bilirubin, indoleacrylic acid                              |
| 13   | Paniz Jasbi (2019)      | BC patients(102)   | healthy control(99)                    | plasma | LC-MS/MS                 | Targeted            | hypoxanthine, palmitic acid, stearic acid, acetylglycine, nonadecanoic acid, asparagine, citraconic acid, 2-aminoisobutyric acid, 3-indolepropionic acid, N,N'-dicyclohexylurea, taurine, decanoylcarnitine, urocanic acid                                                                                           | proline, myoinositol, 2-hydroxybenzoic acid, gentisic acid, 2,3-dihydroxybenzoic acid, 5-aminolevulinic acid, pantothenic acid, cytidine, 4-pyridoxic acid, TMAO, agmatine, indole-3-acetic acid, indole, betaine, glycoyamine, xanthine, 3-indoxylsulfate |
| 14   | Dan Tudor Eniu (2019)   | BC patients(30)    | healthy control(26)                    | serum  | UHPLC-QTOF-(ESI+)-MS     | Targeted            |                                                                                                                                                                                                                                                                                                                      | arginine, alanine, isoleucine, tyrosine, tryptophan, histidine, leucine, lysine, threonine, valine, glutamine, glutamic acid, proline, amino adipic acid, ornithine, citrulline                                                                            |
| 15   | Xinyang Wang (2018)     | BC patients(34)    | healthy control(44)                    | serum  | UPLC/MS-MS<br>GC-MS      | Targeted            | alanine, aminobutyric acid, asparagine, creatinine, cysteine, dimethylglycine, glycine, glutamic acid, glutamine, histidine, isoleucine, methionine, proline, valine, phenylalanine, serine, taurine, tyrosine                                                                                                       | $\gamma$ -aminobutyric acid, arginine                                                                                                                                                                                                                      |

|    |                        |                                     |                     |        |                       |                          |                                                                                                                                                                                                                                                                                                                                                                                                                                                                                                                                                                                                                                        |                                                                                        |
|----|------------------------|-------------------------------------|---------------------|--------|-----------------------|--------------------------|----------------------------------------------------------------------------------------------------------------------------------------------------------------------------------------------------------------------------------------------------------------------------------------------------------------------------------------------------------------------------------------------------------------------------------------------------------------------------------------------------------------------------------------------------------------------------------------------------------------------------------------|----------------------------------------------------------------------------------------|
| 16 | Nobuhiro Torata (2018) | BC patients(84)                     | healthy control(35) | tissue | MALDI MSI             | Targeted                 | adenosine diphosphate, adenosine monophosphate, adenosine triphosphate, aspartate, citrate, deoxycytidine diphosphate, fructose 1,6-bisphosphate, glutamate, glutathione, glutathione disulfide, guanosine diphosphate, N-acetylaspartate, NADH, UDP-glucose, DP-N-acetylglucosamine, UDP, UMP                                                                                                                                                                                                                                                                                                                                         |                                                                                        |
| 17 | Shankar Suman (2018)   | BC patients(72)                     | healthy control(50) | plasma | <sup>1</sup> H NMR    | Untargeted               | tyrosine, lipid, glucose, lactate, hydroxybutyrate, glutamate, lysine, arginine, lipoprotein                                                                                                                                                                                                                                                                                                                                                                                                                                                                                                                                           | formate, glutamine, NAG, valine, isoleucine                                            |
| 18 | Tushar H. More (2018)  | IDC(76), benign(33) and control(33) |                     | serum  | LC-/MRM-MS<br>GC-MS   | (LC-/MRM-MS)<br>Targeted | $\alpha$ -ketoglutaric acid                                                                                                                                                                                                                                                                                                                                                                                                                                                                                                                                                                                                            | ascorbic acid, tryptophan, tyrosine, phenylalanine, uric acid, UDP, creatine, pyruvate |
|    |                        | IDC(24), benign(24) and normal(24)  |                     | tissue |                       | (GC-MS)<br>Untargeted    | histidine, glutamine, tyrosine, creatine, phenylalanine, lactic acid, adonitol, glutamic acid                                                                                                                                                                                                                                                                                                                                                                                                                                                                                                                                          | 3,7-cholest-5-ene                                                                      |
| 19 | Mengzhe Guo (2018)     | BC patients(10)                     | healthy control(10) | urine  | HPLC-ESI-MS/MS        | Targeted                 | 5-(formyl)-2'-deoxycytidine, 5-(carboxyl)-2'-deoxycytidine                                                                                                                                                                                                                                                                                                                                                                                                                                                                                                                                                                             | 5-(hydroxymethyl)-2'-deoxycytidine                                                     |
| 20 | Carina Cavaco (2018)   | BC patients(66)                     | healthy control(40) | saliva | HS-SPME/GC-MS         | Untargeted               | acetic acid, propanoic acid                                                                                                                                                                                                                                                                                                                                                                                                                                                                                                                                                                                                            | 3-methyl-pentanoic acid, 4-methyl-pentanoic acid, phenol, 1,2-decanediol               |
| 21 | Mo'nica P. Cala (2018) | BC patients(58)                     | healthy control(29) | plasma | GC-MS<br>NMR<br>LC-MS | Untargeted               | valine, alanine, isoleucine, serine, glutamic acid, 4-hydroxyproline, 2-hydroxybutyric acid, 3-hydroxybutyric acid, glycerol, myristic acid, palmitoleic acid, palmitic acid, linoleic acid, oleic acid, arachidonic acid, decanoylcarnitine, decenoylcarnitine, dodecenoylcarnitine, laurylcarnitine, linoleyl carnitine, myristoylcarnitine, oleoylcarnitine, palmitoylcarnitine, tetradecadiencarnitine, tetradecenoylcarnitine, 11'-carboxy- $\gamma$ -tocotrienol, 9'-carboxy- $\gamma$ -tocotrienol, $\gamma$ -homolinolenic acid, adrenic acid, arachidonic acid, docosapentaenoic acid, 12-HETE, stearic acid, lactate, lipids | pyruvic acid, cPA(18:0)                                                                |

|    |                          |                                                    |                                      |        |                           |            |                                                                                                                                                                                                                                                                                                 |                                                                                                                                                                                                                                                                                                                                                                                                                                                                                                                                                                                              |
|----|--------------------------|----------------------------------------------------|--------------------------------------|--------|---------------------------|------------|-------------------------------------------------------------------------------------------------------------------------------------------------------------------------------------------------------------------------------------------------------------------------------------------------|----------------------------------------------------------------------------------------------------------------------------------------------------------------------------------------------------------------------------------------------------------------------------------------------------------------------------------------------------------------------------------------------------------------------------------------------------------------------------------------------------------------------------------------------------------------------------------------------|
| 22 | Mónica Cala (2018)       | BC patients(31)                                    | healthy control(29)                  | urine  | GC-MS<br>LC-QTOF/MS       | Untargeted | PG(O-36:1), PA(O-16:0), PC(34:1), DG(32:0), PA(37:6), PA(33:3)                                                                                                                                                                                                                                  | valine, alanine, leucine, threonine, glycine, $\beta$ -alanine, glutamic acid, cysteine, tryptophan, glycolic acid, malonic acid, maleic acid, succinic acid, uracil, aminomalonic acid, N-methyl-glutamic acid, N-acetylglutamic acid, homovanillic acid, 4-hydroxymandelic acid, hippuric acid, citric acid, adenine, gulonic acid-lactone, indoleacetic acid, 5-methylthioadenosine, cetohexoses, sucrose, turanose, dimethylheptanoylcarnitine, decenoylcarnitine, decatrienoylcarnitine, decadienoylcarnitine, octenoylcarnitine, LPE(18:2), LPE(20:4), LPC(14:1), glycerol 3-phosphate |
| 23 | Jianping Zhou (2017)     | BC patients(11)                                    | healthy control(11)                  | serum  | NMR                       | Untargeted | lipid                                                                                                                                                                                                                                                                                           | choline, glucose, histidine, valine, lysine, acetate, tyrosine, glutamic                                                                                                                                                                                                                                                                                                                                                                                                                                                                                                                     |
|    |                          |                                                    |                                      | urine  |                           |            | citrate                                                                                                                                                                                                                                                                                         | phenylacetyl glycine, guanidoacetate                                                                                                                                                                                                                                                                                                                                                                                                                                                                                                                                                         |
| 24 | Mariona Jové (2017)      | BC patients(91)                                    | healthy control(20)                  | plasma | LC-MS/MS                  | Untargeted | 2-hydroxy-3-methylbutyric acid, 2-hydroxy-3-methylpentanoic acid, 3-methylglutaric acid, 7-ketocholesterol, chenodeoxycholic acid, cytidine, DL-pipecolic acid, dopamine, homocystine, inosine diphosphate, linoleic acid, myristic acid, oleamide, stearic acid, taurine, threonate, uric acid | 2-methylhippuric acid, 2-octenoic acid, 3-hydroxyanthranilic acid, 4-acetamidobutanoate, 5- $\beta$ -cholestane-3 $\alpha$ , 7 $\alpha$ , 12 $\alpha$ -triol, 5 $\alpha$ -androstane-3,17-dione, 7 $\alpha$ -hydroxy-cholesterol, caproic acid, cortisol, cortisone, creatine, glutamine, hippuric acid, L-arginine, L-lysine, L-valine, N-oleoyl-D-erythroSphingosine(C18:1 ceramide), retinoic acid                                                                                                                                                                                        |
| 25 | Naila Irum Hadi (2017)   | pre-operative BC patients(152)<br>neoadjuvant BC   | healthy control(155)                 | serum  | GC-MS                     | Untargeted | tetradecane, $\alpha$ -D-glucopyranoside, methyl stearate, 1-4-benzene                                                                                                                                                                                                                          | dimethyldodecane, D-galactose, $\alpha$ -glyceryl stearate                                                                                                                                                                                                                                                                                                                                                                                                                                                                                                                                   |
| 26 | Liping Zhong (2016)      | BC patients(30)                                    | healthy control(25)                  | saliva | HILIC<br>RPLC UPLC-ESI-MS | Untargeted | lysoPC(18:1), PS(14:1/16:1), lysoPC(16:0), lysoPC(22:6), MG(0:0/14:0/0:0), lysoPE(18:2/0:0), PC(18:0/16:0), phenylalanine, citrulline, histidine, N-acetylneuraminic acid, PE(22:0/20:4), 4-hydroxyphenylpyruvic acid                                                                           | lysoPC(18:2), palmitic amide, phytosphingosine acetylphenylalanine, propionylcholine                                                                                                                                                                                                                                                                                                                                                                                                                                                                                                         |
| 27 | Qingjun Wang (2016)      | early BC patients(258)                             | BE control(81)<br>healthy people(78) | serum  | MS                        | Targeted   | propionylcarnitine, acetylcarnitine, tyrosine                                                                                                                                                                                                                                                   | cysteine, proline, asparagine, piperamide, homocysteine, tryptophane, lysine, histidine                                                                                                                                                                                                                                                                                                                                                                                                                                                                                                      |
| 28 | Takahiro Takayama (2016) | BC patients before(111)<br>and after operation(80) | healthy control(61)                  | saliva | UPLC-MS/MS                | Targeted   | SPM(spermine), CAD(cadaverine), Ac-SPM(N1-acetyl-spermine), N1-Ac-SPD(N1-acetyl-spermidine), N8-Ac-SPD(N8-acetyl-spermidine), DAc-SPD(N1N8-diacetyl-spermidine), DAc-SPM(N1N12-diacetyl-spermine), Ac-PUT (N1-acetyl-putrescine)                                                                |                                                                                                                                                                                                                                                                                                                                                                                                                                                                                                                                                                                              |

|    |                             |                                                                  |                     |              |                      |            |                                                                                                                                                                                                                              |                                                                                                                                                                                                                                                                                                                                                                                                          |
|----|-----------------------------|------------------------------------------------------------------|---------------------|--------------|----------------------|------------|------------------------------------------------------------------------------------------------------------------------------------------------------------------------------------------------------------------------------|----------------------------------------------------------------------------------------------------------------------------------------------------------------------------------------------------------------------------------------------------------------------------------------------------------------------------------------------------------------------------------------------------------|
| 29 | Luisa Matos Do Canto (2016) | BC patients(43)<br>affected breast vs unaffected control         |                     | ductal fluid | UPLC-QTOF/MS         | Untargeted | angustifoline, phosphatidyl glycerol (12:0/0:0)                                                                                                                                                                              | N-acetyl-dtryptophan, 1,2,3,4-tetrahydroisoquinoline, gluconolactone, phosphatidyl glycerol (18:0/0:0), 9-aminononanoic acid, hydrocortisone butyrate, ceramide (d18:2/22:0), pentaethylene glyco, peroxyacetic acid uroporphyrin III                                                                                                                                                                    |
| 30 | Sijia Huang (2016)          | BC patients(106)                                                 | healthy control(61) | serum plasma | LC-TOFMS<br>GC-TOFMS | Untargeted | hypotaurine, pyruvate                                                                                                                                                                                                        | succinate, choline, serine, glycine, alanine                                                                                                                                                                                                                                                                                                                                                             |
| 31 | Min Cui (2016)              | IDC patients(20)                                                 | healthy control(20) | serum        | LC/MS                | Untargeted | LPE(18:1/0:0), LPE(18:0/0:0), LPE(22:0/0:0), sphingomyelin(d18:0/20:0), PC(38:0), glutaconylcarnitine, tryptophyl-leucine, tyrosyl-aspartate, aspartyl-phenylalanine, diglyceride(20:1/14:1/0:0), diglyceride(22:5/22:0/0:0) | ceramide(d18:1/26:0), ceramide(d18:1/20:0), ceramide(d18:1/23:0), LPC(18:0/0:0)                                                                                                                                                                                                                                                                                                                          |
| 32 | Guoxiang Xie (2015)         | BC patients(35)                                                  | healthy control(35) | serum plasma | LC-TOFMS<br>GC-TOFMS | Untargeted | cystine, glutamine, cysteine, hypotaurine, asparagine, butyryl carnitine, propionyl carnitine, glyoxylate, uracil                                                                                                            | aspartate, glutamate, 5-oxoproline, isoleucine, N-acetyl glutamine, aminoacetone, delta-hydroxylysine, glycerolphosphate, glycerophosphocholine, arachidonate, octadecanoate, nicotinurate, choline, $\alpha$ -ketoglutarate, oxaloacetate, 4-hydroxy-2-oxoglutarate, lactate, malate, pentosidine, quinate, epinephrine, glucuronide                                                                    |
| 33 | ZhuGen Cao (2015)           | BC patients(20)                                                  | healthy control(50) | serum        | ESI-QTOF-MS          | Targeted   | tryptophan                                                                                                                                                                                                                   |                                                                                                                                                                                                                                                                                                                                                                                                          |
| 34 | Batur Mamtimin (2014)       | BC patients(35)                                                  | healthy control(35) | plasma       | NMR                  | Untargeted | VLDLs, unsaturated lipids, pyruvate, carnitine                                                                                                                                                                               | creatine, creatinine, lactate, isoleucine, leucine, valine, alanine, glycoprotein, 1-methylhistidine, tyrosine, phenylalanine, myo-inositol, scyllo-inositol, choline, $\alpha$ -glucose, $\beta$ -glucose                                                                                                                                                                                               |
| 35 | Yunping Qiu (2013)          | BC patients(55)                                                  | healthy control(25) | plasma       | ESI-MS/MS            | Targeted   | PC ae C36:2, PC aa C38:6, PC aa C40:6, PC aa C34:2, PC aa C38:0, PC ae C34:2, SM (OH) C22:2, SM (OH) C14:1, SM (OH) C16:1, SM (OH) C22:1, SM C20:2, C4                                                                       | PC ae C40:3, PC ae C38:3, PC ae C40:4, PC ae C38:1, PC ae C42:4, PC ae C40:5, PC ae C40:2, PC ae C44:3, PC ae C38:2, PC ae C42:1, PC aa C40:3, PC aa C40:2, PC aa C40:4, PC aa C42:5, lysoPC a C16:0, lysoPC a C18:0, lysoPC a C20:4, lysoPC a C18:1, lysoPC a C17:0, lysoPC a C20:3, lysoPC a C28:0, lysoPC a C16:1, lysoPC a C24:0, lysoPC a C26:0, PC aa C42:4, PC ae C42:5, PC ae C40:3, PC ae C40:2 |
| 36 | Maria Chiara Mimmi (2013)   | BC patients(3)                                                   | healthy control(3)  | tissue       | LC-ESI-MS/NMR        | Targeted   | choline, phosphocholine, glycerophosphocholine                                                                                                                                                                               |                                                                                                                                                                                                                                                                                                                                                                                                          |
| 37 | Tone F. Bathen (2013)       | BC patients(228)<br>tumor tissue vs non-involved adjacent tissue |                     | tissue       | HR MAS MRS           | Untargeted | phosphocholine, glycine, taurine, creatine, lactate, ascorbate                                                                                                                                                               | glucose                                                                                                                                                                                                                                                                                                                                                                                                  |

|    |                                                 |                                |                                        |        |                |            |                                                                                                                                                                                                                                                                                                                         |                                                                  |
|----|-------------------------------------------------|--------------------------------|----------------------------------------|--------|----------------|------------|-------------------------------------------------------------------------------------------------------------------------------------------------------------------------------------------------------------------------------------------------------------------------------------------------------------------------|------------------------------------------------------------------|
| 38 | Wuwen Lv<br>(2012)                              | BC patients(40)                | BE patients(40)<br>healthy control(34) | serum  | GC-MS          | Targeted   | (BC vs BE/HC)<br>palmitic acid, stearic acid, linoleic acid, n-6,<br>total free fatty acid                                                                                                                                                                                                                              | (BC/BE vs HC)<br>C12:0<br>(BC vs HC)<br>C18:3, C20:5, C22:5      |
| 39 | Jiang Huang<br>(2012)                           | postmenopausal BC(86)          | healthy control(36)                    | urine  | UFLC-MS/MS     | Targeted   | estrone, 17 $\beta$ -estradiol, 2-hydroxyestradiol, 4-<br>hydroxyestradiol                                                                                                                                                                                                                                              | 16 $\alpha$ -hydroxyestrone, 2-methoxyestradiol                  |
| 40 | Scarlet F. Brockm $\ddot{u}$<br>oller<br>(2012) | BC patients(228)               | healthy control(228)                   | tissue | GC-MS, LC-MS   | Targeted   | sn-glycerol-3-phosphate, PC(34:3), PC(36:4),<br>PC(34:4e), TG(16:0/16:1/18:1), PC(38:5e),<br>PC(36:5), Cer(d18:1/17:0), PC(36:2),<br>PE(36:2), PE(P-18:0:22:5), PC(38:6),<br>PC(34:2), PE(P-38:5), PC(32:1), PC(38:5),<br>TG(49:3), SM(d18:1/14:0), PC(18:0/22:6),<br>PI(18:0/20:4), PC(P-<br>18:0/20:4)/PC(O18:2/20:4) |                                                                  |
| 41 | Yohei Miyagi<br>(2011)                          | BC patients(196)               | healthy control(976)                   | plasma | HPLC-ESI-MS    | Targeted   | glycine, alanine, ornithine, threonine, serine,<br>proline, lysine                                                                                                                                                                                                                                                      | glutamine, tyrosine, tryptophan,<br>phenylalanine, histidine     |
| 42 | Masahiro Sugimoto<br>(2010)                     | BC patients(30)                | healthy control(87)                    | saliva | CE-TOF-MS      | Untargeted | cadaverine, glycine, alanine, putrescine,<br>phenylalanine, tyrosine, ethanolamine, serine,<br>$\alpha$ -aminobutyric acid, leucine+isoleucine,<br>proline, lysine, ornithine, aspartic acid,<br>valine, glutamic acid, threonine                                                                                       | glycerophosphocholine, taurine, piperidine                       |
| 43 | Carolyn M. Slupsky<br>(2010)                    | BC patients(48)                | healthy control(72)                    | urine  | NMR            | Targeted   | creatine, acetate, succinate, lactate,<br>pyroglutamate, formate, isoleucine, sucrose,<br>leucine, asparagine, urea, glucose,<br>ethanolamine, dimethylamine, 4-<br>hydroxyphenylacetate, creatinine, alanine,<br>hippurate, uracil, valine, trans-aconitate                                                            |                                                                  |
| 44 | Han Min Woo<br>(2009)                           | BC patients(10)                | healthy control(22)                    | urine  | GC-MS<br>LC-MS | Untargeted | 8-hydroxy-2-deoxyguanosine, 5-<br>hydroxymethyl-2-deoxyuridine, 11-<br>ketoandrosterone                                                                                                                                                                                                                                 | androsterone, 16 $\alpha$ -<br>hydroxydehydroepiandrosterone     |
| 45 | Hojung Nam<br>(2009)                            | BC patients(50)                | healthy control(50)                    | urine  | GC-MS          | Untargeted | urea                                                                                                                                                                                                                                                                                                                    | homovanillate, 4-hydroxyphenylacetate,<br>5-hydroxyphenylacetate |
| 46 | Yanhua Chen<br>(2009)                           | BC patient(20)<br>(16 had IDC) | healthy control(18)                    | urine  | RRLC-MS/MS     | Untargeted | tyrosine, phenylalanine, tryptophan, nicotinuric<br>acid, kynurenic acid, indolelactic acid,<br>dimethylarginine, pantothenic acid,<br>succinyladenosine, dimethylguanosine,<br>apronal, threonylcarbamoyl adenosine                                                                                                    |                                                                  |

## Supplementary Table S2

| Ref. | First Author (Year)      | BC Cell Lines                  | Normal Control | Sample | Detecting Instrument | Targeted/Untargeted | Up-regulated Metabolites                                                                                                                                                                                                                                                                                                                                                        | Down-regulated Metabolites                                       |
|------|--------------------------|--------------------------------|----------------|--------|----------------------|---------------------|---------------------------------------------------------------------------------------------------------------------------------------------------------------------------------------------------------------------------------------------------------------------------------------------------------------------------------------------------------------------------------|------------------------------------------------------------------|
| 47   | Siqi Du (2019)           | MCF-7                          | MCF-10A        | cell   | HPLC-MS/MS           | Untargeted          | aspartic acid, serine, asparagine                                                                                                                                                                                                                                                                                                                                               | leucine, isoleucine, valine, phenylalanine, glutamine            |
| 48   | Catarina L. Silva (2017) | T-47D, MDA-MB-231, MCF-7       | HMEC           | cell   | HS-SPME GC-MS        | Untargeted          | 2-pentanone, 2-heptanone, 3-methyl-3-buten-1-ol, ethyl acetate, ethyl propanoate, 2-methyl butanoate                                                                                                                                                                                                                                                                            |                                                                  |
| 49   | Lucas Willmann (2016)    | BT-474, MDA-MB-231 MDA-MB-453  | MCF-10A        | cell   | LC-MS                | Untargeted          | 1-methylinosine, 3-methylcytidine, 5-methyluridine, N2-methylguanosine, N6-methyl-N6-threonylcarbamoyladenosine, N6-threonylcarbamoyladenosine                                                                                                                                                                                                                                  | prostaglandin F1 $\alpha$ , hypoxanthine                         |
| 50   | Hye-Youn Kim (2016)      | MCF-7, MDA-MB-231              | MCF-10A        | cell   | GC-MS DI-MS          | Untargeted          | guanine, PS(18:1/22:4), PE(18:1/20:4), PI(16:0/18:1), PS(17:0/18:1), PC(16:1/18:1), PC(18:1/18:2), PC(18:1/18:1), PC(18:2/20:3), PC(18:0/20:4), PC(18:1/20:0), PC(18:1/22:5), PE(18:1/20:4), PE(18:1/22:4), PS(16:1/18:1), PS(16:0/18:1), PS(16:0/18:0), PS(17:0/18:1), PS(18:0/18:0), PS(18:1/20:0), PS(18:0/22:6), PS(18:1/22:0), PI(16:0/16:1), PI(16:1/18:1), PI(18:1/20:4) | xanthine, glucose-6-phosphate, mannose-6-phosphate               |
| 32   | Guoxiang Xie (2015)      | MCF-7                          | MCF-10A        | cell   | LC-TOFMS GC-TOFMS    | Targeted            | aspartate                                                                                                                                                                                                                                                                                                                                                                       |                                                                  |
| 51   | Lucas Willmann (2015)    | MDA-MB-231, MDA-MB-453, BT-474 | MCF-10A        | cell   | GC-EI-MS             | Untargeted          | gluconic acid, 3-phosphoglyceric acid, pyruvic acid, taurine                                                                                                                                                                                                                                                                                                                    | isoleucine, tyrosine, valine, tryptophan, phenylalanine, leucine |
| 52   | Lucas Willmann (2015)    | BT-474, MDA-MB-231, MD-MBA-453 | MCF-10A        | cell   | LC-MS                | Targeted            | pseudouridine, 3-methylcytidine, 1-methyladenosine, 5-methyluridine, 1-methylguanosine, xanthosine, N4-acetylcytidine, N6-threonyl-carbamoyladenosine, 2-methylthio-N6-threonylcarbamoyladenosine, N6-Methyl-N6-threonylcarbamoyladenosin                                                                                                                                       |                                                                  |
| 53   | Roberta M. Maria (2015)  | MCF-7, MDA-MB-231              | MCF-10A        | cell   | 1H HR-MAS NMR        | Untargeted          | phosphocholine, acetone                                                                                                                                                                                                                                                                                                                                                         | glucose, ethanol                                                 |
| 54   | Dória, M. Luísa (2013)   | T47-D, MDA-MB-231              | MCF-10A        | cell   | TLC-MS               | Untargeted          | alkylacyl PCs, phosphatidylinositol, PI (18:0/18:1), PI (18:1/18:1 and 18:2/18:0), PC (14:0/18:1 and 16:0/16:1), PI (16:0/18:1 and 16:1/18:0)                                                                                                                                                                                                                                   | PI (20:4/18:0)                                                   |
| 55   | M. Luísa Doória (2012)   | MC4-L5, MC4-L2                 | EpH4           | cell   | TLC-MS ESI-MS        | Targeted            | sphingomyelin, phosphatidylinositol                                                                                                                                                                                                                                                                                                                                             | phosphatidylethanolamine                                         |
| 56   | Maria D. Cao (2012)      | MCF-7, MDA-MB-231              | MCF-12A        | cell   | HR MAS MRS           | Untargeted          | phosphocholine, total choline                                                                                                                                                                                                                                                                                                                                                   | glycerophosphocholine                                            |
| 57   | Adam L. Meadows (2008)   | MCF-7                          | 48R HMECs      | cell   | GC-MS                | Untargeted          | lactate                                                                                                                                                                                                                                                                                                                                                                         | glucose, glutamine                                               |
